# Supplementary material for: Defect-driven oxygen reduction reaction (ORR) of carbon without any element doping
Source: Royal Society of Chemistry journal article supplement (doi:10.1039/c5qi00236b), 2016-01-01
Supplement: c5qi00236b1.pdf [file c5qi00236b1.pdf]

# Defect-driven Oxygen Reduction Reaction (ORR) of Carbon without Any Element Doping

Xiaojun Zhao,<sup>abc</sup> Xiaoqin Zou,<sup>b</sup> Xuecheng Yan,<sup>a</sup> Christopher L. Brown,<sup>a</sup> Zhigang Chen,<sup>d</sup>  
Guangshan Zhu<sup>b</sup> and Xiangdong Yao,<sup>\*,a</sup>

<sup>a</sup> Queensland Micro- and Nanotechnology Centre, Griffith University, Nathan QLD 4111, Australia.

E-mail: x.yao@griffith.edu.au

<sup>b</sup> State Key Laboratory of Inorganic Synthesis & Preparative Chemistry, Jilin University, Changchun 130012, China. E-

mail: zhugs@jlu.edu.cn

<sup>c</sup> Clinical Pharmacology Center, Research Institute of Translational Medicine, The First Bethune Hospital of Jilin University, Changchun 130061, China

<sup>d</sup> School of Mechanical and Mining Engineering, The University of Queensland, St. Lucia, Queensland 4072, Australia

## Detailed Experimental Section

**Reagents and Materials.** All chemicals purchased are reagent grade or better and are used without further purification. 2,6-Naphthalenedicarboxylic acid (2,6-NDC, 99%), zinc nitrate hexahydrate ( $\text{Zn}(\text{NO}_3)_2 \cdot 6\text{H}_2\text{O}$ , 99%), platinum on graphitized carbon (Pt/C, wt 20%) and Nafion® 117 solution (5%) are purchased from Sigma-Aldrich. N, N-diethylformamide (DEF, 99%) is purchased from Alfa Aesar.

**Preparation of IRMOF-8.** IRMOF-8 compound was synthesized basing on the reported literature.  $\text{Zn}(\text{NO}_3)_2 \cdot 6\text{H}_2\text{O}$  (0.55 g) and 2,6-NDC (0.15 g) were dissolved in 50 mL DEF and dispensed to 100 mL Teflon-lined stainless steel vessels, the reaction was carried out at 95 °C for 20 hours under autogenous pressure. After filtering and washing with 5 mL DEF for three times, the cubic crystals of IRMOF-8 were collected.<sup>1-4</sup>

**Synthesis of PC-I8-950 porous carbon.** Under nitrogen flow and with a heating rate of 5 °C·min<sup>-1</sup>, 500mg of IRMOF-8 crystals were heating at 150 °C for 90 minutes to remove guest molecules, and then the treatment temperature raised to 550 °C and remained for 180 minutes. Finally, the sample was heated at 950 °C for 240 minutes and lower to room temperature. The black powerful product were collected directly and denoted as PC-I8-950.

## Instruments and characterization

The N<sub>2</sub> adsorption and desorption isotherm was measured on a Micromeritics Tristar II 3020 analyser. X-ray photoelectron spectroscopy (XPS) was recorded by an ESCALAB-M II 250 photoelectron spectrometer with Al-K $\alpha$  X-ray radiation as the X-ray source for excitation. X-ray diffraction (XRD) pattern was recorded by a PANalytical Empyrean Diffractometer using Ag-K $\alpha$  radiation, 60 kV, 30 mA with a scanning rate of 1°·min<sup>-1</sup> and the data were calibrated with respect to Cu-K $\alpha$  radiation. Raman spectrum was measured on a Renishaw in Via Raman Microscopy with 514 nm laser. All electrochemical experiments were carried out with a CHI 760E electrochemical workstation (CH Instruments) in a three-electrode electrochemical cell.

## Electrochemical Measurements

Electrochemical performance of PC-I8-950 and Pt/C catalysts were measured in the three-electrode

electrochemical cell, which employed Pt wire, Ag/AgCl (filled with saturated KCl aqueous solution) and glassy carbon (GC) electrode as the counter electrodes, reference electrodes and working electrode respectively.

The inks of carbon catalysts and Pt/C were prepared by same method. The catalyst powder (1 mg) was dispersed in 1 mL mixed solution of Nafion, ethanol and deionized water with the volume ratio of 1: 15: 34.

12  $\mu\text{L}$  catalyst inks were loaded onto a GC electrode of 4 mm in diameter and dried at 60  $^{\circ}\text{C}$  for 10 min. Before beginning each measurement, the electrolyte, which is 0.1 M KOH aqueous solution, was saturated with  $\text{O}_2$  or  $\text{N}_2$ , and  $\text{O}_2$  or  $\text{N}_2$  flow kept bubbling during the period of electrochemical measurement in order to maintain saturated state of KOH electrolyte.

**Cyclic Voltammetry (CV).** The catalyst modified working electrode was prepared by the method as above. The GC electrode as a working electrode was scanned at a rate of 50  $\text{mV}\cdot\text{s}^{-1}$  in the potential range from 0.20 to -1.20 V (vs. Ag/AgCl).

**Rotating Disk Electrode (RDE) Measurement.** The catalyst modified working electrode was prepared by the same method. The working electrode rotated with varying speed from 400 to 2500 rpm at a scanned rate of 10  $\text{mV}\cdot\text{s}^{-1}$ .

LSV curves are investigated by Koutecky–Levich plots ( $J^{-1}$  vs  $\omega^{-1/2}$ ) at different electrode potentials from -0.30 to -0.60 V (vs. Ag/AgCl). The slopes of the best linear fit lines are used to calculate the diffusion-limiting and kinetic current density ( $J_K$ ) and the number of electrons transferred ( $n$ ) per  $\text{O}_2$  molecule from Koutecky–Levich equation:

$$\frac{1}{J} = \frac{1}{J_L} + \frac{1}{J_k} = \frac{1}{B\omega^{1/2}} + \frac{1}{J_k} \quad (B = 0.2nF(D_{\text{O}_2})^{2/3}(\nu)^{-1/6}C_{\text{O}_2})$$

$J$  is the measured current density,  $J_L$  and  $J_K$  are the diffusion-limiting and kinetic current densities, and  $\omega$  is the rotating speed.  $n$  represents the number of electrons transferred per  $\text{O}_2$  molecule,  $F$  is the Faraday constant ( $F = 96485 \text{ C}\cdot\text{mol}^{-1}$ ),  $D_{\text{O}_2}$  is the diffusion coefficient of  $\text{O}_2$  in 0.1 M KOH ( $1.9\times 10^{-5} \text{ cm}^2\cdot\text{s}^{-1}$ ),  $\nu$  is the kinetic viscosity of electrolyte ( $0.01 \text{ cm}^2\cdot\text{s}^{-1}$ ),  $C_{\text{O}_2}$  is the bulk concentration of  $\text{O}_2$  ( $1.2 \times 10^{-6} \text{ mol}\cdot\text{cm}^{-3}$ ).

**Methanol crossover effect response.** The catalyst modified GC electrode was prepared by same method as above. At a voltage of -0.30 V (vs. Ag/AgCl), the current-time (i-t) chronoamperometric response was recorded in  $\text{O}_2$ -saturated 0.1 M KOH aqueous solution for Pt/C and PC-I8-950 catalysts. The methanol was added into the electrochemical cell with a volume ratio of 1:10.

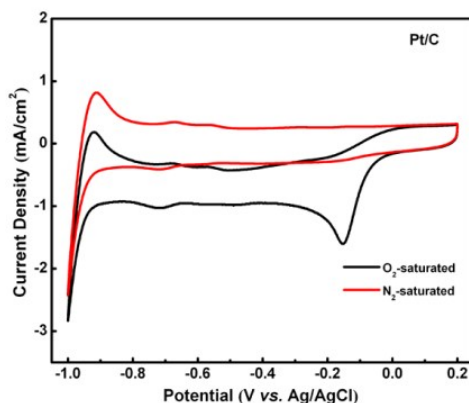

**Figure S1.** CV curves of Pt/C in 0.1 M KOH solution.

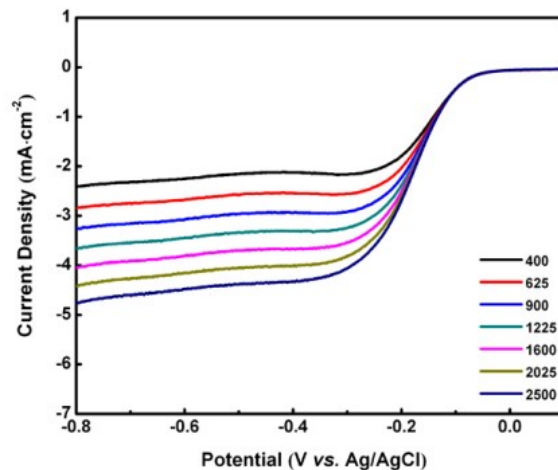

**Figure S2.** Linear sweep voltammogram (LSV) curves of PC-I8-950 catalyst in oxygen -saturated 0.1M KOH solution. The rotation speed of GC electrode is varied from 400 to 2500 rpm and the scan rate is  $10 \text{ mV} \cdot \text{s}^{-1}$ .

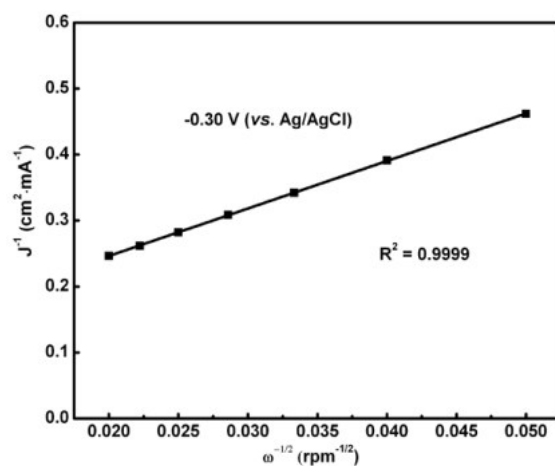

**Figure S3.** Koutecky–Levich plot of the carbon products at a potential of -0.30 V. The plots are generated from the LSV curves of PC-I8-950 tested in oxygen-saturated 0.1 M KOH solution with different rotating speeds.

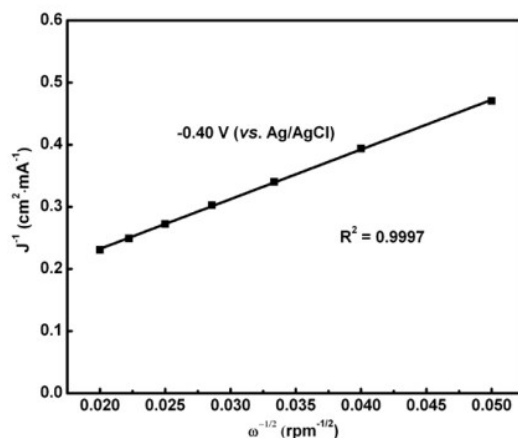

**Figure S4.** Koutecky–Levich plot of the carbon products at a potential of -0.40 V. The plots are generated from the LSV curves of PC-I8-950 tested in oxygen-saturated 0.1 M KOH solution with different rotating speeds.

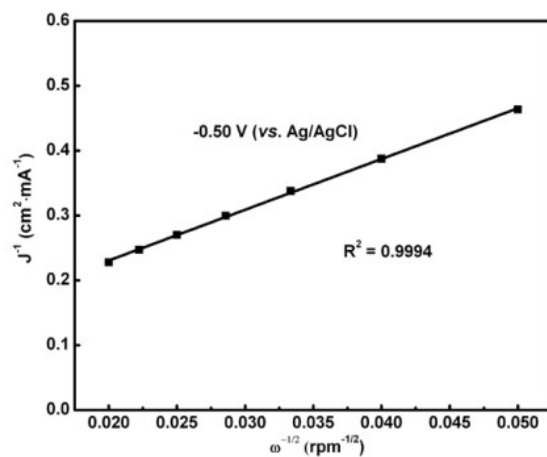

**Figure S5.** Koutecky–Levich plot of the carbon products at a potential of -0.50 V. The plots are generated from the LSV curves of PC-I8-950 tested in oxygen-saturated 0.1 M KOH solution with different rotating speeds.

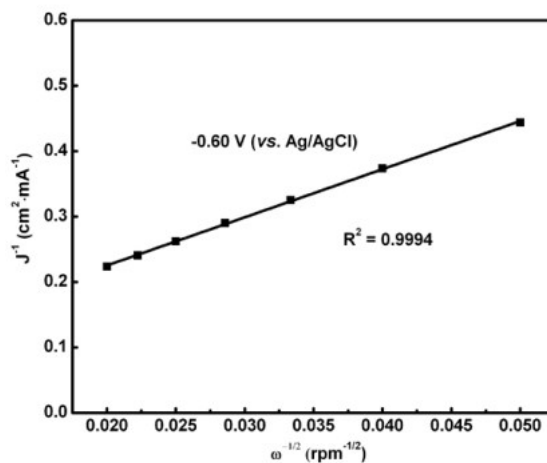

**Figure S6.** Koutecky–Levich plot of the carbon products at a potential of -0.60 V. The plots are generated from the LSV curves of PC-I8-950 tested in oxygen-saturated 0.1 M KOH solution with different rotating speeds.

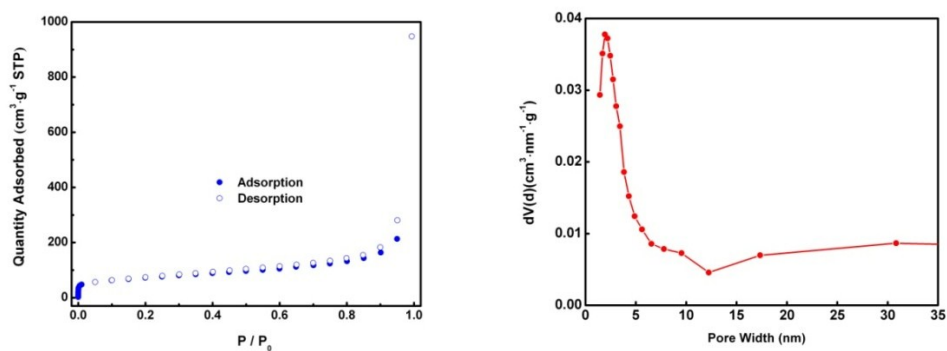

**Figure S7.** Nitrogen adsorption isotherms (left) and pore distribution curve (right) of XC-72.

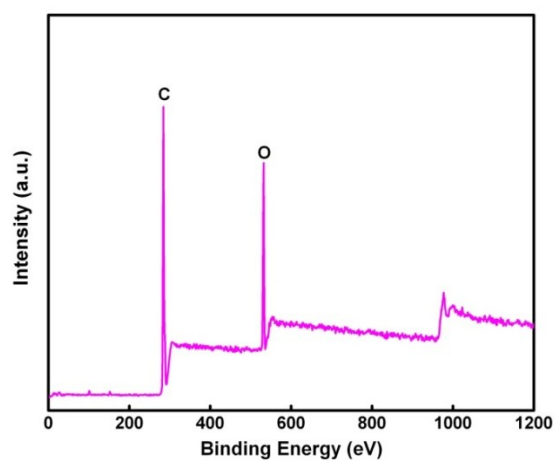

Figure S8. XPS survey spectrum of XC-72.

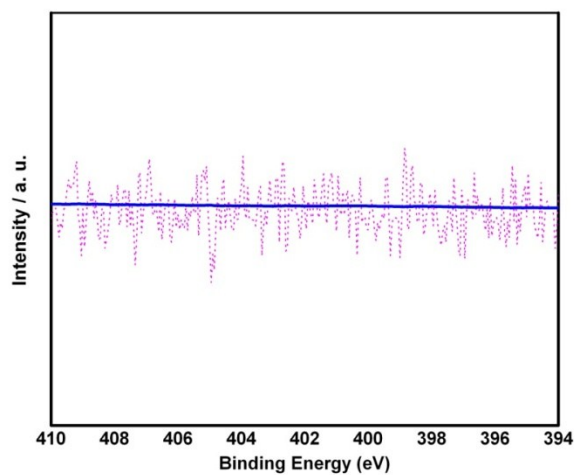

Figure S9. High-resolution N 1s spectra of XC-72.

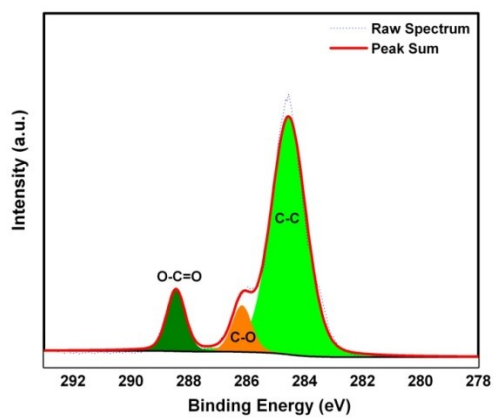

Figure S10. High-resolution C 1s spectra of XC-72.

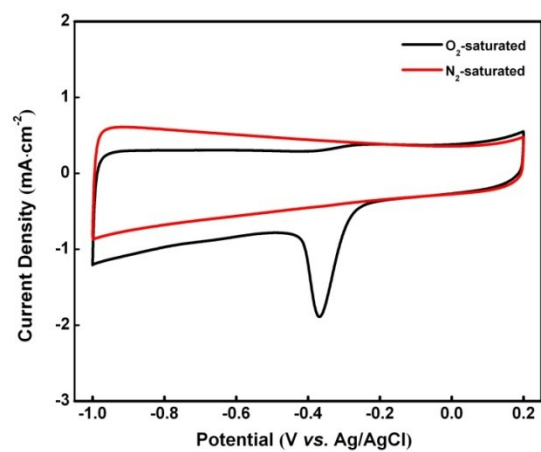

**Figure S11.** CV curves of XC-72 in 0.1 M KOH solution.

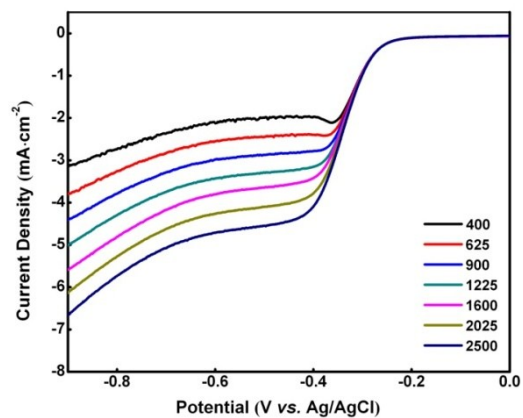

**Figure S12.** Linear sweep voltammogram (LSV) curves of XC-72 sample in oxygen -saturated 0.1M KOH solution. The rotation speed of GC electrode is varied from 400 to 2500 rpm and the scan rate is 10 mV·s<sup>-1</sup>.

| Table S1. Textural parameters of PC-I8-950 calculated by N <sub>2</sub> adsorption |                                                                       |                                                                         |                                                                          |                                                                          |
|------------------------------------------------------------------------------------|-----------------------------------------------------------------------|-------------------------------------------------------------------------|--------------------------------------------------------------------------|--------------------------------------------------------------------------|
|                                                                                    | S <sub>BET</sub> <sup>[a]</sup><br>(m <sup>2</sup> ·g <sup>-1</sup> ) | S <sub>micro</sub> <sup>[b]</sup><br>(m <sup>2</sup> ·g <sup>-1</sup> ) | V <sub>total</sub> <sup>[c]</sup><br>(cm <sup>3</sup> ·g <sup>-1</sup> ) | V <sub>micro</sub> <sup>[d]</sup><br>(cm <sup>3</sup> ·g <sup>-1</sup> ) |
| PC-I8-950                                                                          | 836                                                                   | 275                                                                     | 1.09                                                                     | 0.12                                                                     |

<sup>[a]</sup> S<sub>BET</sub> is the surface area calculated by Brunauer-Emmett-Teller equation.

<sup>[b]</sup> S<sub>micro</sub> is microporous surface area calculated by t-plot method.

<sup>[c]</sup> Total pore volume is calculated at a relative pressure of 0.96.

<sup>[d]</sup> Micro-pore volume is calculated by t-plot method.

| Table S2. The carbon state and content of PC-I8-950 and XC-72 calculated by XPS |             |       |       |       |
|---------------------------------------------------------------------------------|-------------|-------|-------|-------|
| PC-I8-950                                                                       | Peak (eV)   | 284.6 | 286.2 | 288.6 |
|                                                                                 | State       | C-C   | C-O   | O-C=O |
|                                                                                 | Content (%) | 80.39 | 10.10 | 9.51  |
| XC-72                                                                           | Peak (eV)   | 284.6 | 286.2 | 288.5 |
|                                                                                 | State       | C-C   | C-O   | O-C=O |
|                                                                                 | Content (%) | 80.39 | 8.84  | 10.77 |

| Table S3. The number of electrons transferred (n) of Pt/C and PC-I8-950 |       |       |       |       |
|-------------------------------------------------------------------------|-------|-------|-------|-------|
| E (eV)                                                                  | -0.30 | -0.40 | -0.50 | -0.60 |
| Pt/C                                                                    | 4.0   | 4.0   | 4.0   | 4.0   |
| PC-I8-950                                                               | 3.6   | 3.5   | 3.6   | 3.6   |

## Supplementary Information References

- (1) M. Eddaoudi, J. Kim, N. Rosi, D. Vodak, J. Wachter, M. O'Keeffe, O. M. Yaghi, *Science*, 2002, **295**, 469.
- (2) O. M. Yaghi, M. O'Keeffe, H. Li, J. Kim, N. Rosi, U.S. Patent Application 2003/0004364.
- (3) J. Rowsell, A. Millward, K. Park, O. M. Yaghi, *J. Am. Chem. Soc.*, 2004, **126**, 5666.
- (4) M. Miller, C. Wang, G. N. Merrill, *J. Phys. Chem. C*, 2009, **113**, 3222.
